# Supplementary material
Source: PubMed Central journal article supplement (PMC3211136)
Supplement: NIHMS329359-supplement-1_si_001.pdf [file NIHMS329359-supplement-1_si_001.pdf]

## ONLINE SUPPLEMENTAL MATERIALS

### **Investigation of Unanticipated Alkylation at the N( $\pi$ ) Position of a Histidyl Residue Under Mitsunobu Conditions and Synthesis of New Orthogonally Protected Histidine Analogues**

Wenjian Qian, Fa Liu<sup>§</sup> and Terrence R. Burke, Jr.\*

*Chemical Biology Laboratory, Molecular Discovery Program, Center for Cancer Research, National Cancer Institute, National Institutes of Health, Frederick, MD 21702, USA*

\*Corresponding author:

Terrence R. Burke, Jr., Ph.D.

National Cancer Institute

National Institutes of Health

Building 376 Boyles St., NCI-Frederick

Frederick, MD 21702

U. S .A.

Phone: (301) 846-5906; Fax: (301) 846-6033

E-mail: [tburke@helix.nih.gov](mailto:tburke@helix.nih.gov)

<sup>§</sup>Currently with Lilly Research Laboratories, Indianapolis, IN 46285

#### **Contents**

<sup>1</sup>H and <sup>13</sup>C NMR spectra of **7**, **8**, **9**, and **11** and 1D NOESY assignment of N( $\pi$ )-alkylation in **11**, HPLC charts of peptide **2**, **3**, **4**, **5**, **13**.

# $^1\text{H}$ and $^{13}\text{C}$ NMR spectra of 7

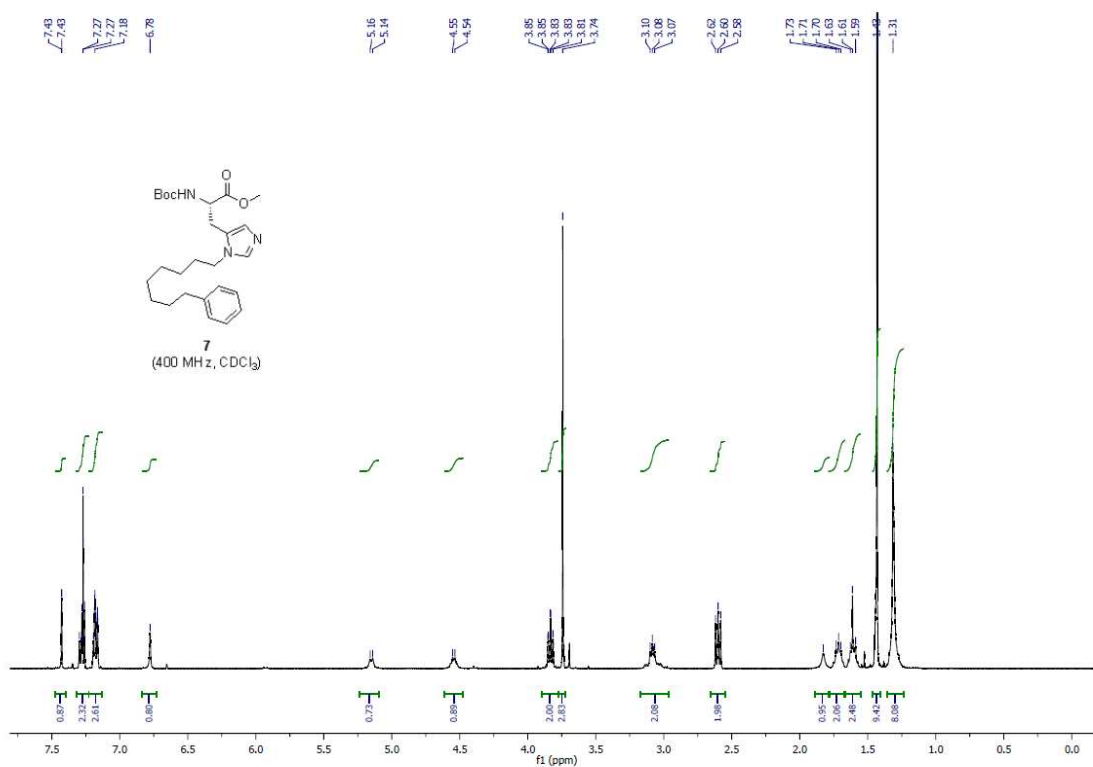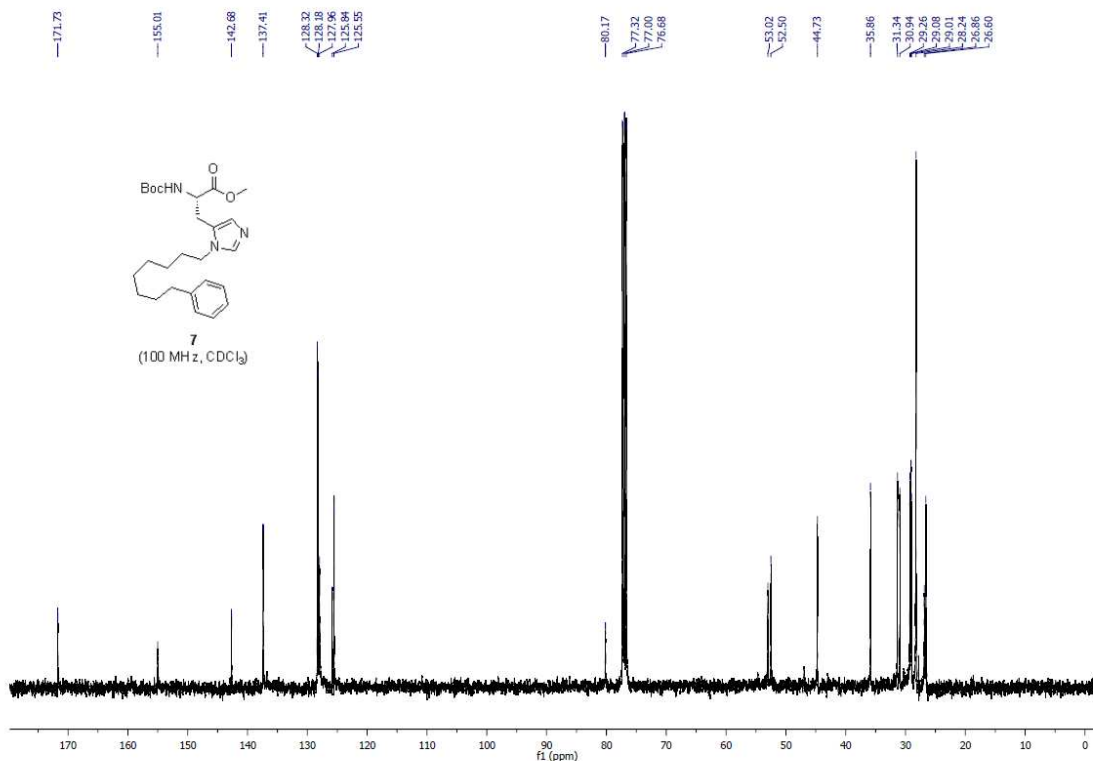

# <sup>1</sup>H and <sup>13</sup>C NMR spectra of 8

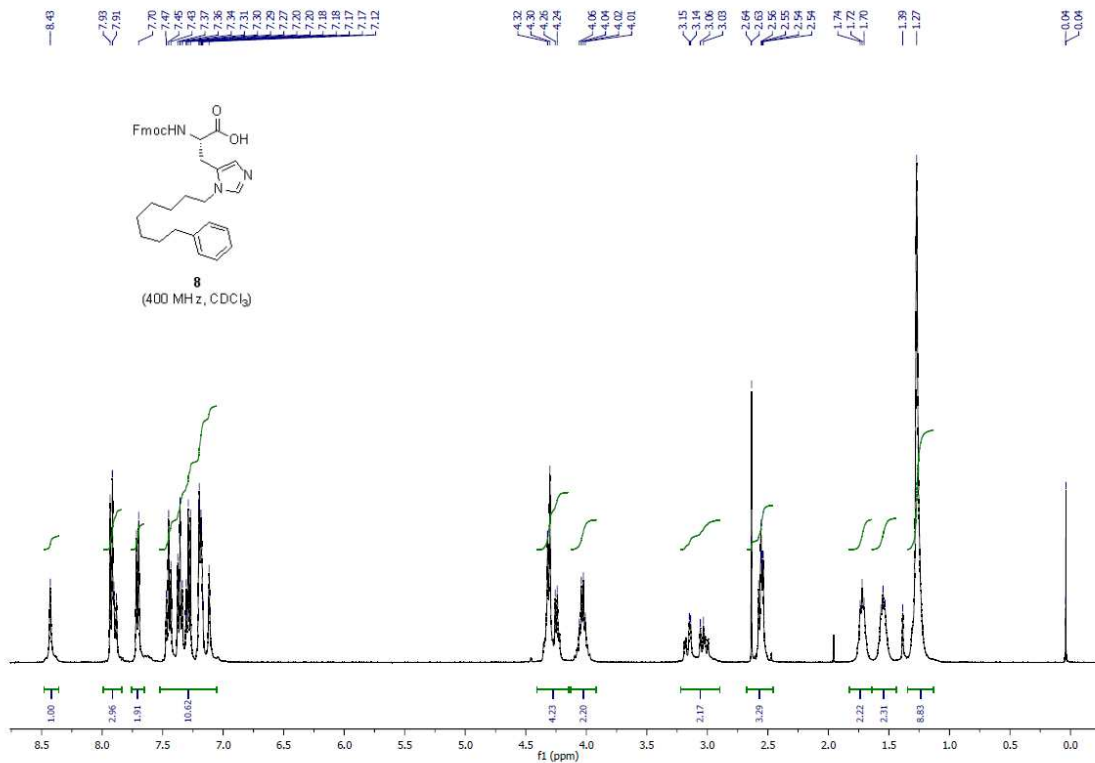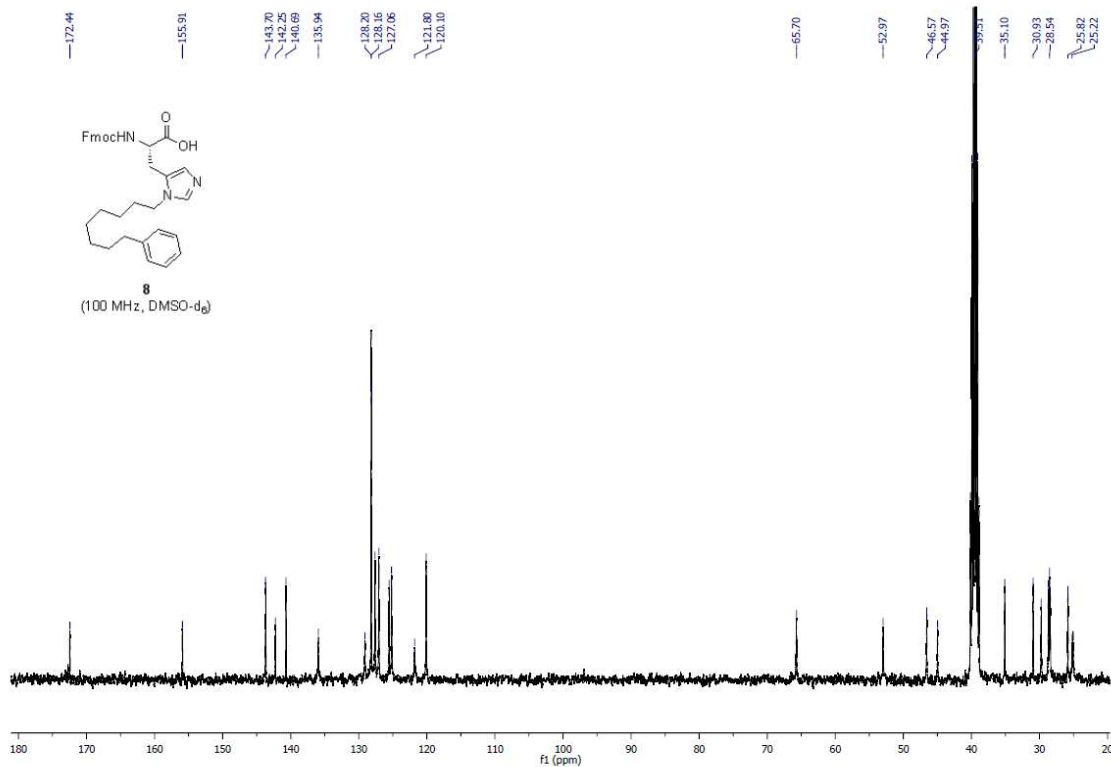

# <sup>1</sup>H and <sup>13</sup>C NMR spectra of 9

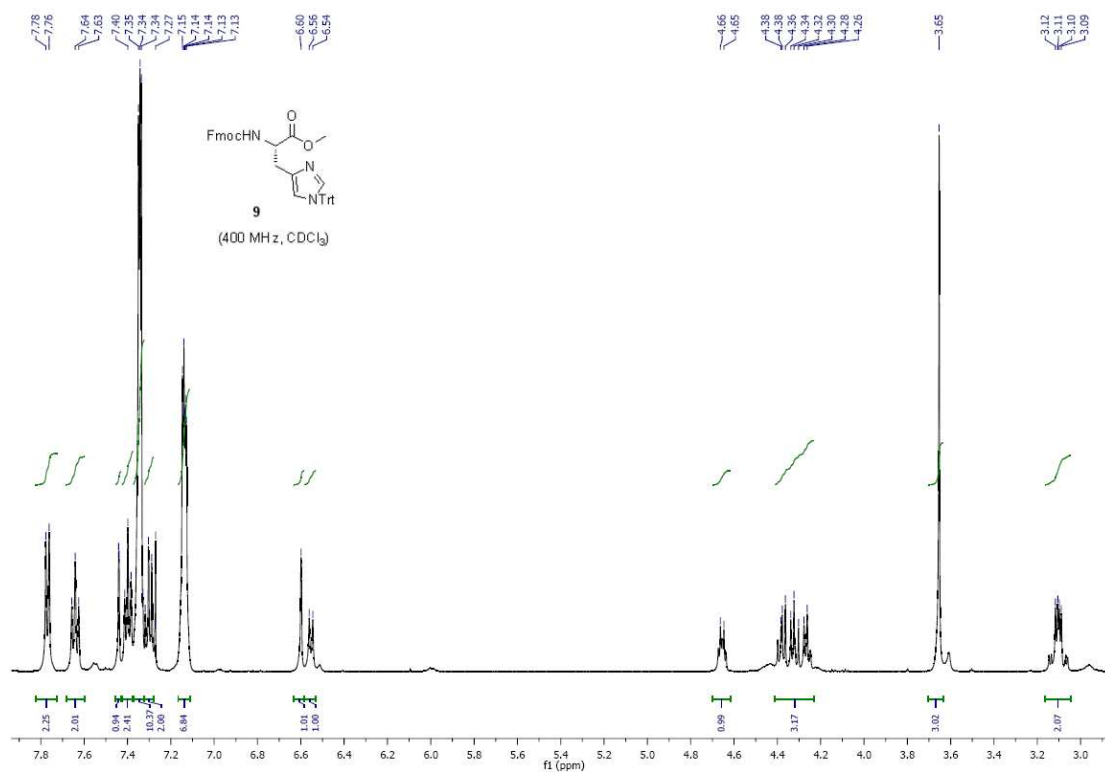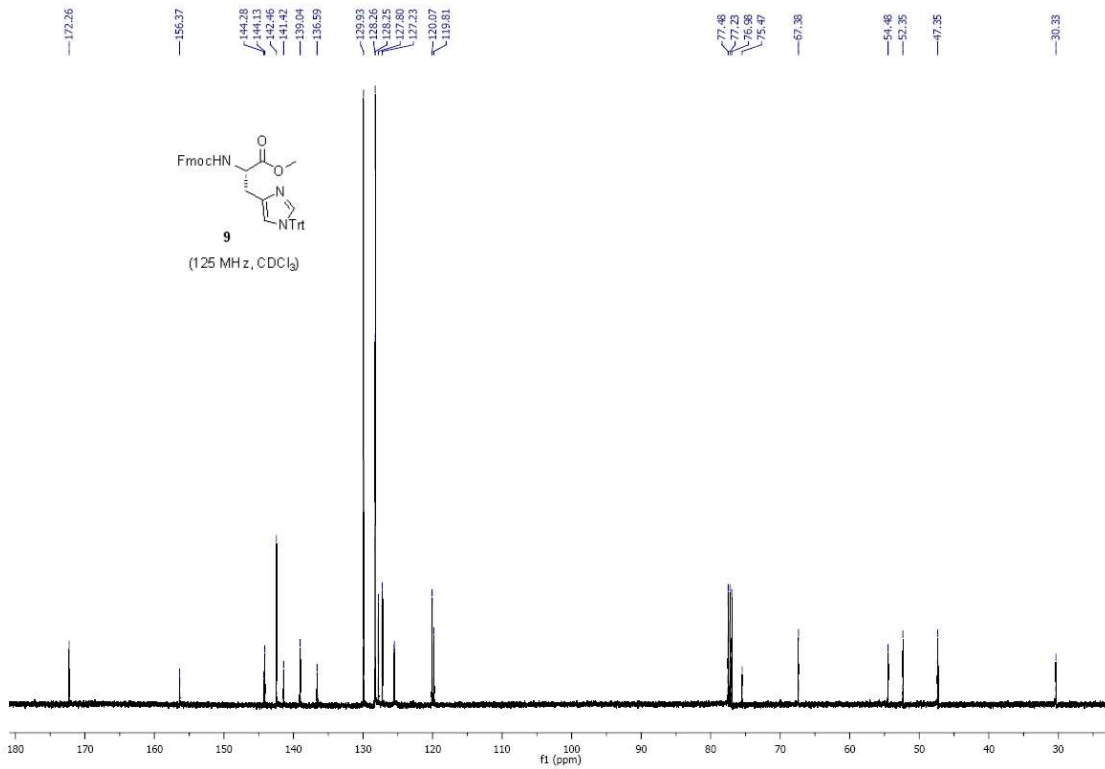

# <sup>1</sup>H and <sup>13</sup>C NMR spectra of 11

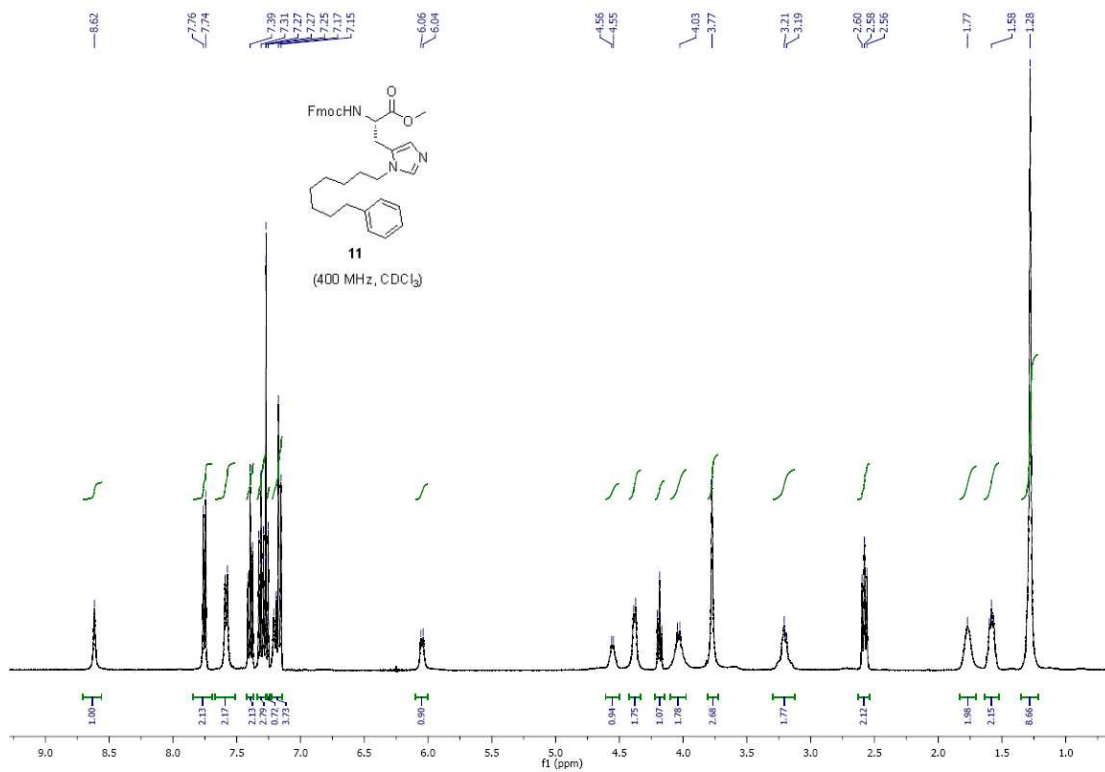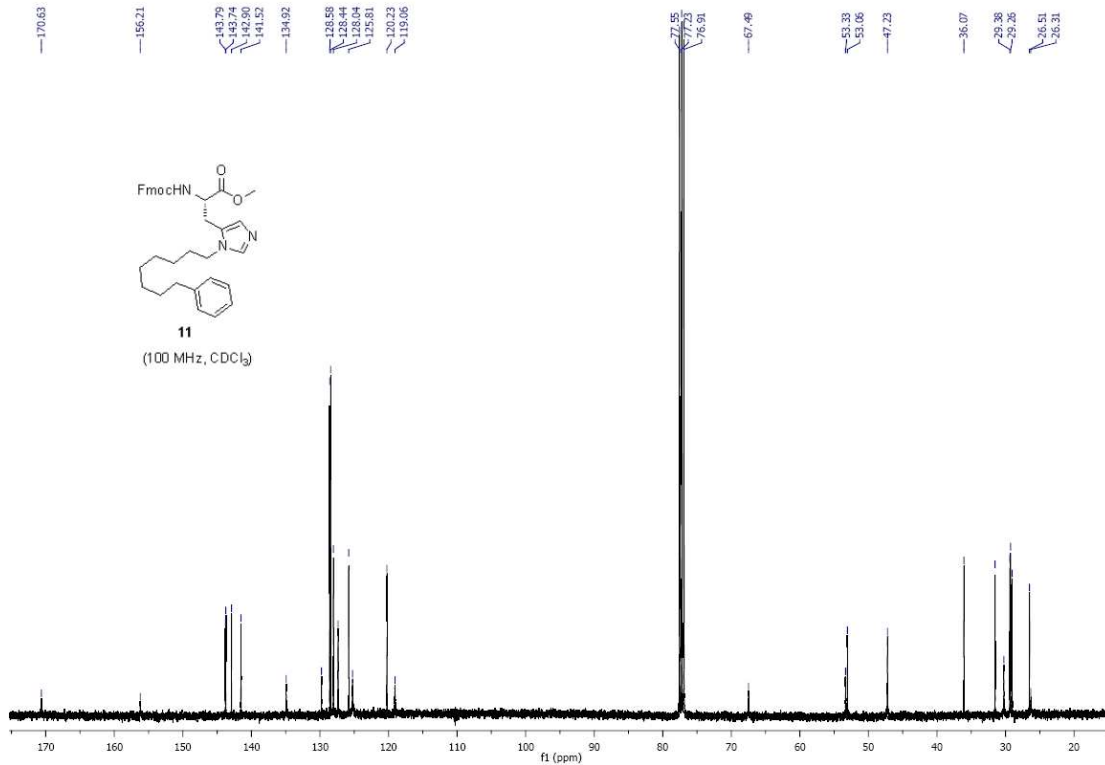

## NOE of Compound 11

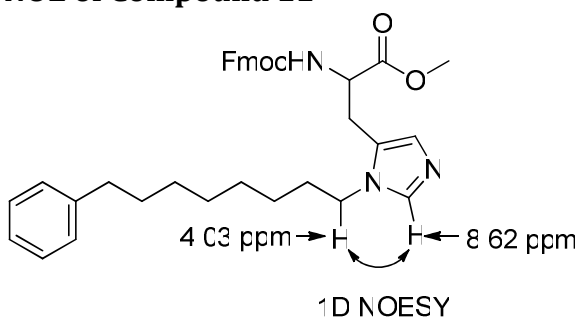

1D NOESY

500 MHz, relax. Delay 1.0 sec, mixing time 500 ms

Selective band center: 4.03 ppm

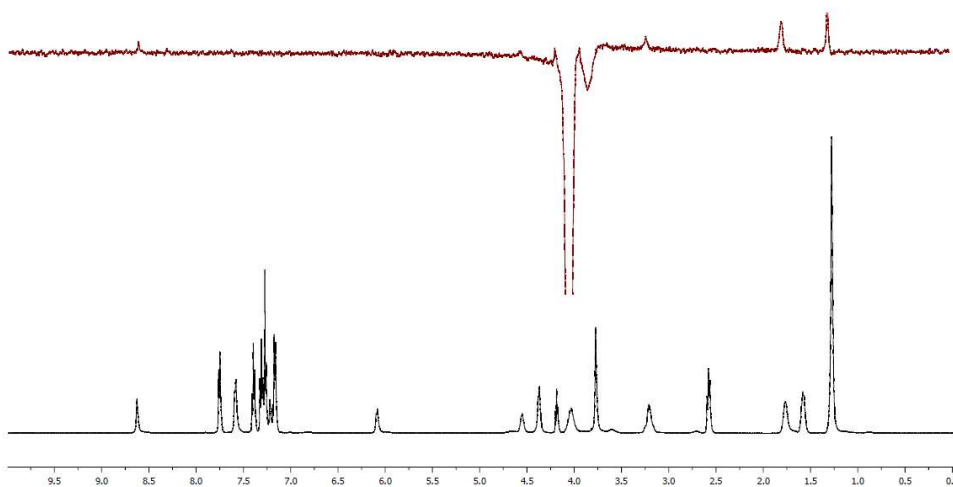

Selective band center: 8.62 ppm

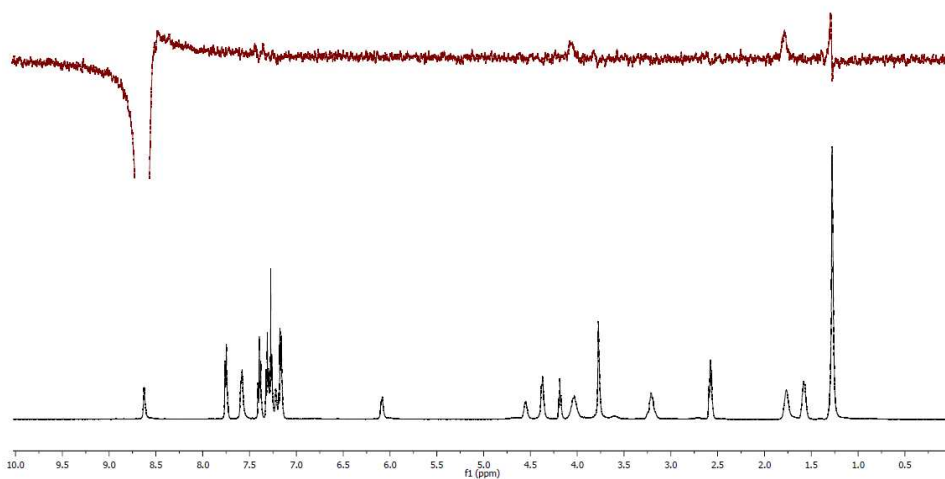

### HPLC Charts for Peptide 2, 3, 4, 5, 13

**Table 1. MS and HPLC retention time**

| No | Expect (M + H) <sup>+</sup> | Observed (M + H) <sup>+</sup> | Retention time/<br>min | HPLC<br>method <sup>a</sup> |
|----|-----------------------------|-------------------------------|------------------------|-----------------------------|
| 2  | 863.4                       | 863.4                         | 25.2                   | II                          |
| 3  | 863.4                       | 863.4                         | 24.3                   | II                          |
| 4  | 1051.6                      | 1051.5                        | 29.8                   | I                           |
| 5  | 1037.6                      | 1037.4                        | 29.2                   | I                           |
| 13 | 861.5                       | 861.4                         | 23.3                   | I                           |

<sup>a</sup> HPLC Method:

$\lambda = 220$  nm, flow rate: 10 mL/min

Solvent A: H<sub>2</sub>O, 0.1% TFA; Solvent B: MeCN, 0.1% TFA

I:

|      |   |     |      |     |
|------|---|-----|------|-----|
| Time | 0 | 30  | 30.1 | 35  |
| B%   | 0 | 100 | 100  | 100 |

II:

|      |   |    |      |     |
|------|---|----|------|-----|
| Time | 0 | 30 | 30.1 | 35  |
| B%   | 0 | 90 | 100  | 100 |

## HPLC spectra:

### 1. on-resin mistunobu reaction to afford 2, 3 (Experiment A)

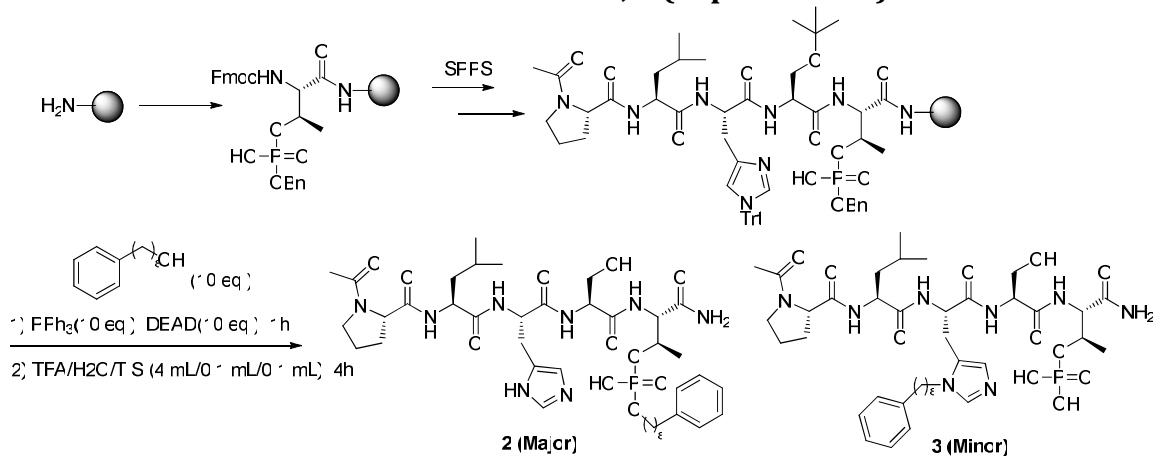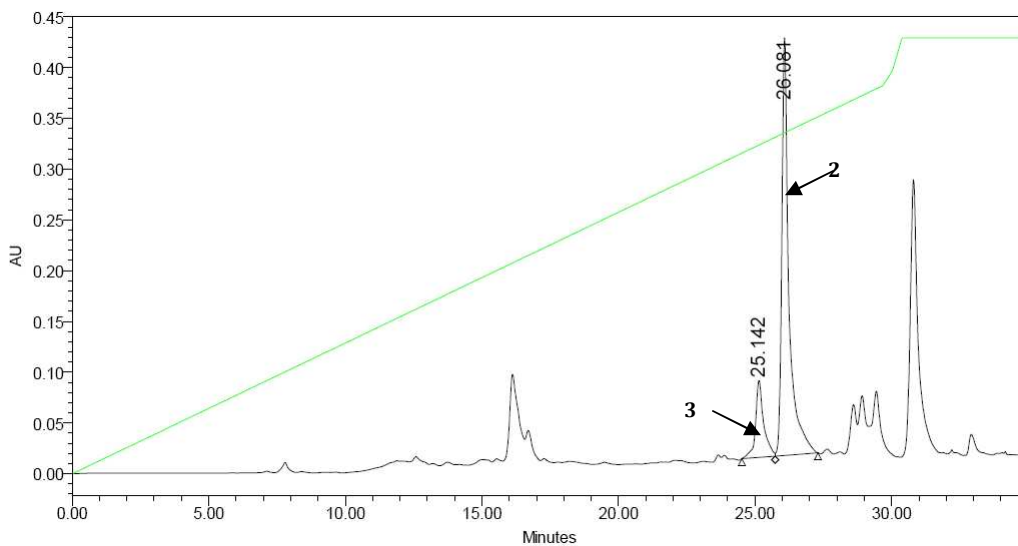

### 2. Test of Mechanism I (Intramolecular alkyl transfer of the phosphoryl ester group) (Experiment B)

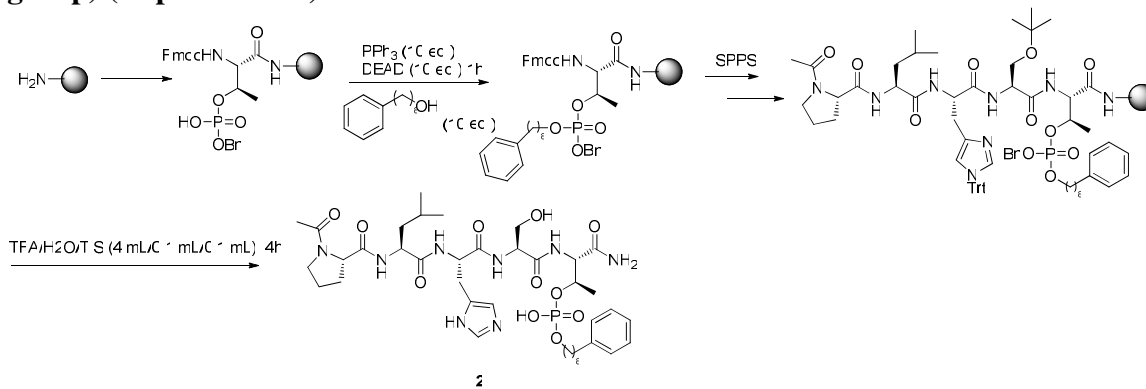



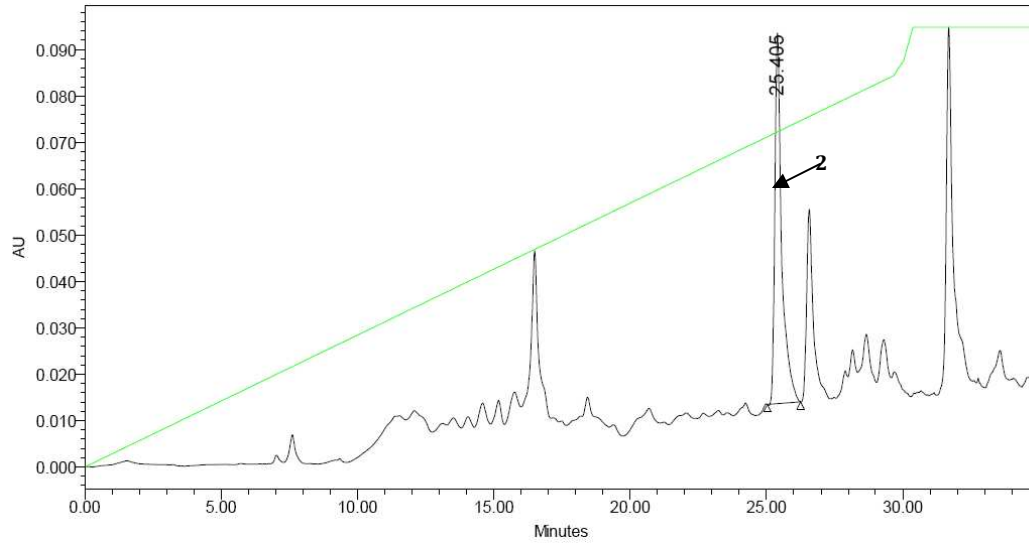

### 3. Mixture Test (Experiment A mixed with Experiment B)

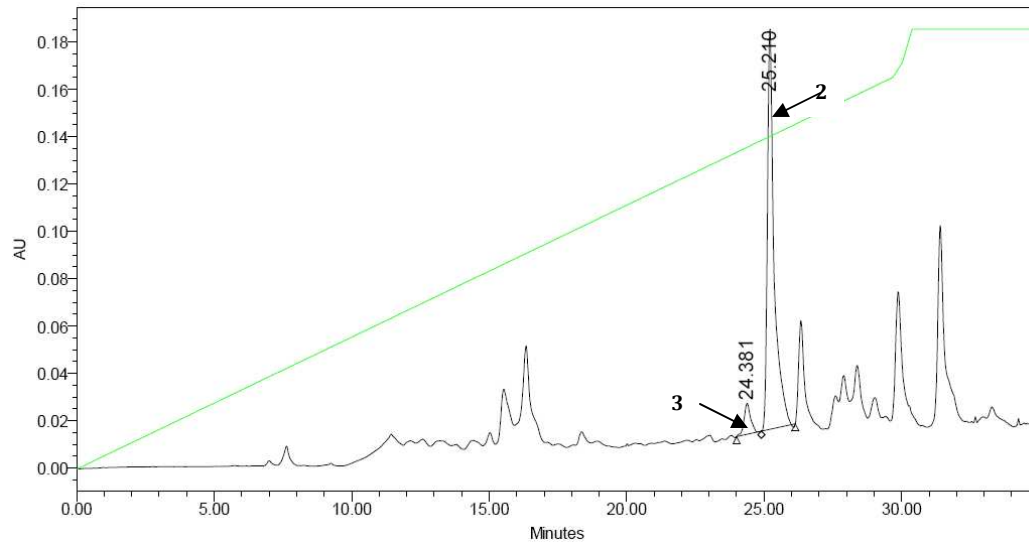

### 4. Test of Mechanism II (Experiment C and D)

#### Experiment C:

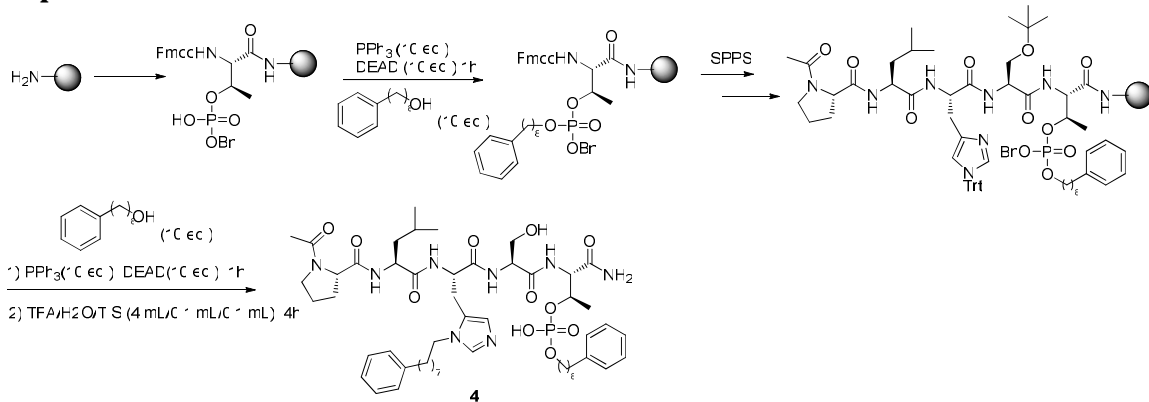

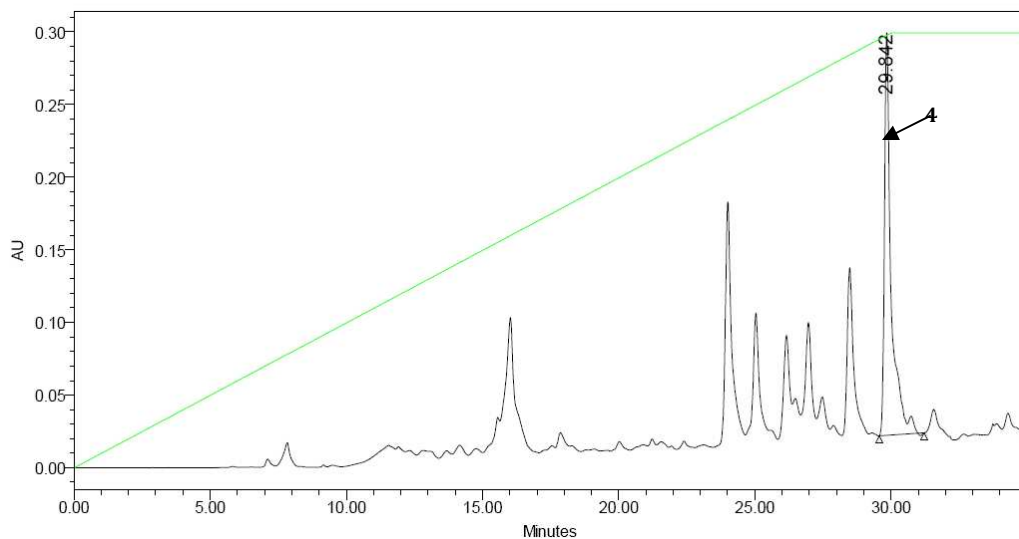

**Experiment D:**

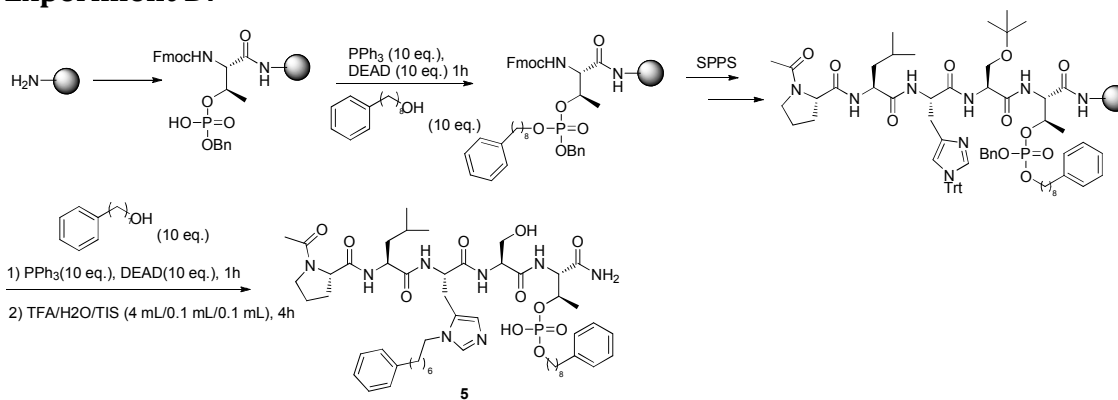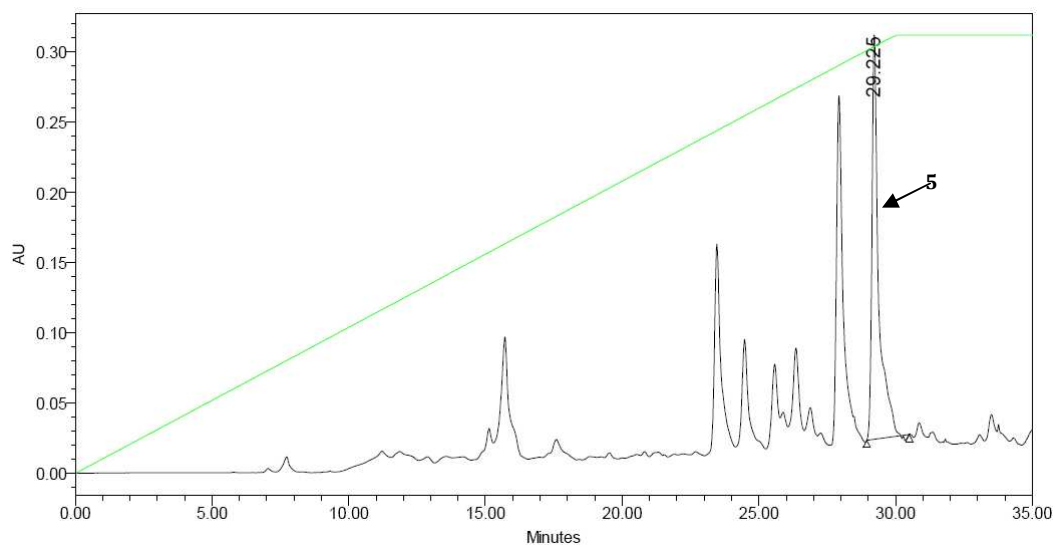

## 5. Post-peptide synthesis on-resin N( $\pi$ )-alkylation (Experiment E)

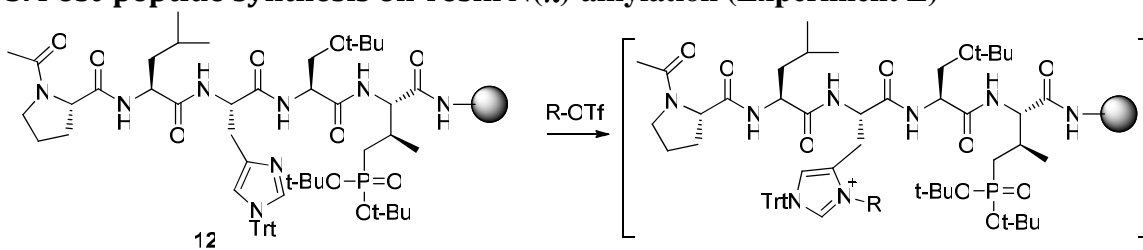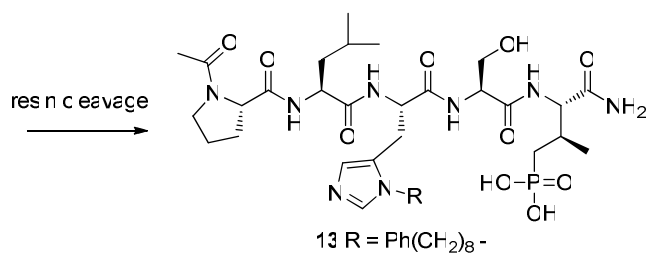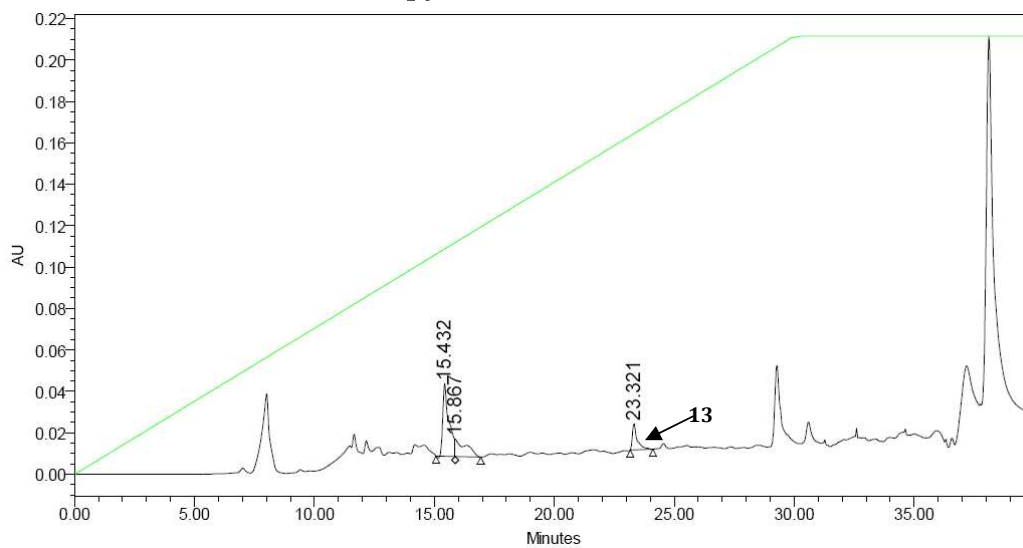

### Purity of Peptide 2, 3, 4, 5, 13

**Table 2. Purity of Peptides**

| No     | 2   | 3   | 4   | 5   | 13   |
|--------|-----|-----|-----|-----|------|
| Purity | 97% | 96% | 98% | 98% | 100% |

HPLC Method:

$\lambda = 220$  nm, flow rate: 1.0 mL/min

Solvent A: H<sub>2</sub>O, 0.1% TFA; Solvent B: MeCN, 0.1% TFA

|      |   |     |      |     |
|------|---|-----|------|-----|
| Time | 0 | 30  | 30.1 | 35  |
| B%   | 0 | 100 | 100  | 100 |

### Peptide 2:

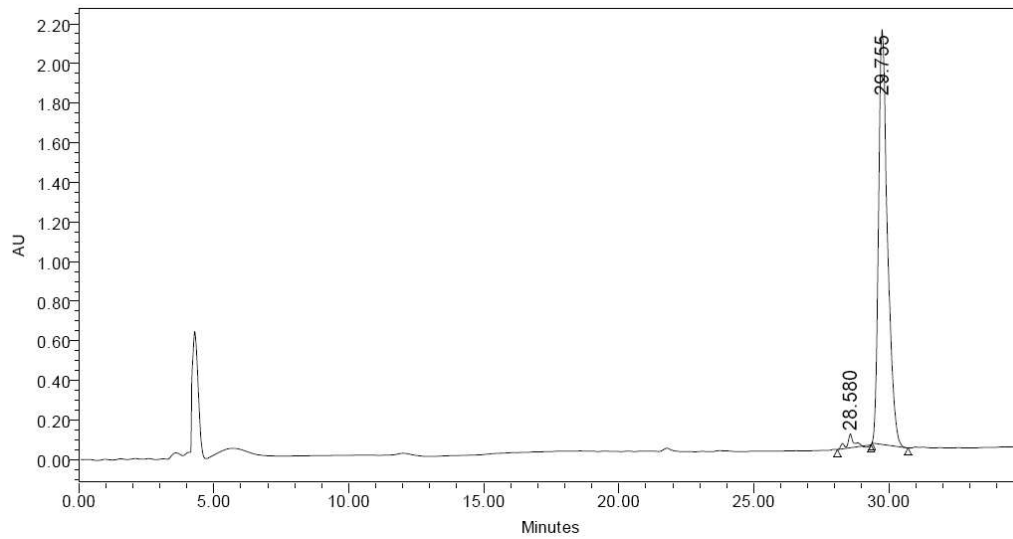

|   | RT     | Area     | % Area | Height  |
|---|--------|----------|--------|---------|
| 1 | 28.580 | 1298495  | 2.62   | 69683   |
| 2 | 29.755 | 48329081 | 97.38  | 2088105 |

### Peptide 3

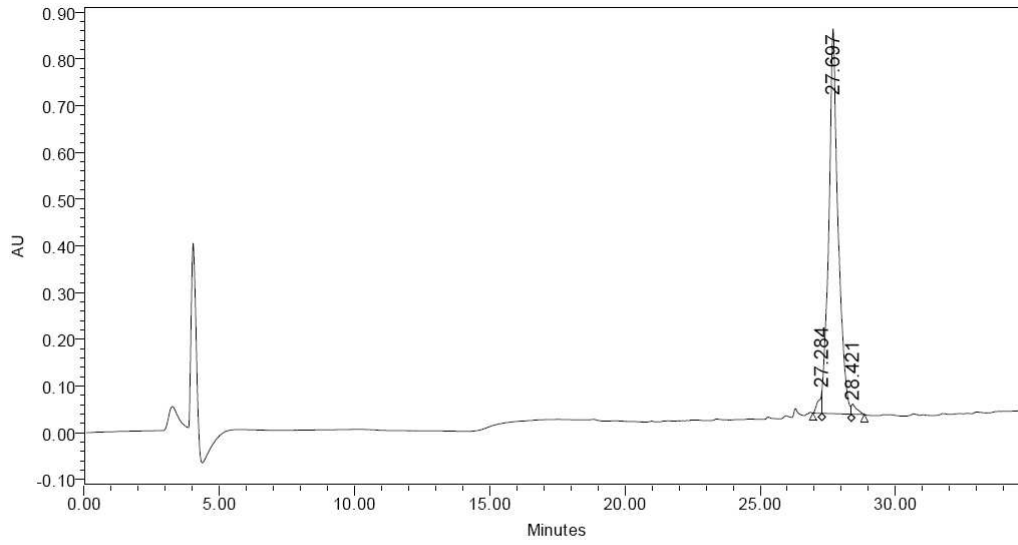

|   | RT     | Area     | % Area | Height |
|---|--------|----------|--------|--------|
| 1 | 27.284 | 403588   | 1.98   | 47621  |
| 2 | 27.697 | 19721340 | 96.58  | 823302 |
| 3 | 28.421 | 293918   | 1.44   | 21107  |

### Peptide 4

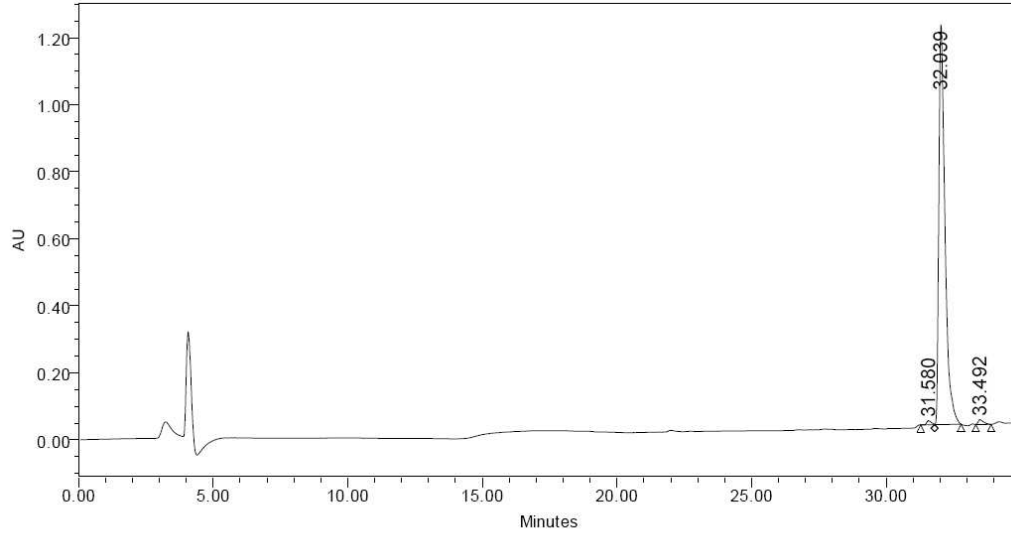

|   | RT     | Area     | % Area | Height  |
|---|--------|----------|--------|---------|
| 1 | 31.580 | 149603   | 0.78   | 11971   |
| 2 | 32.039 | 18959805 | 98.22  | 1195612 |
| 3 | 33.492 | 193813   | 1.00   | 14291   |

### Peptide 5

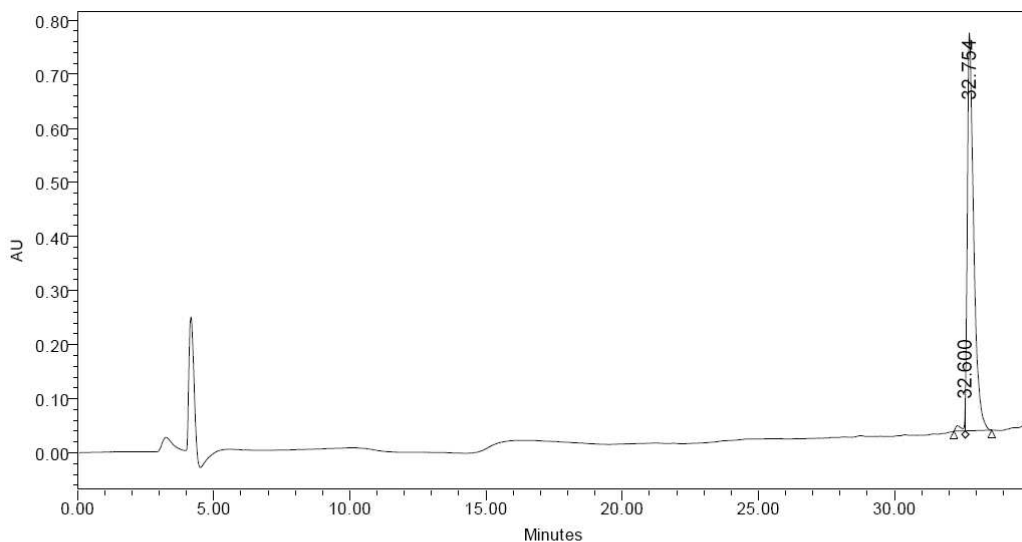

|   | RT     | Area     | % Area | Height |
|---|--------|----------|--------|--------|
| 1 | 32.600 | 201622   | 1.66   | 51715  |
| 2 | 32.754 | 11917745 | 98.34  | 736127 |

### Peptide 13

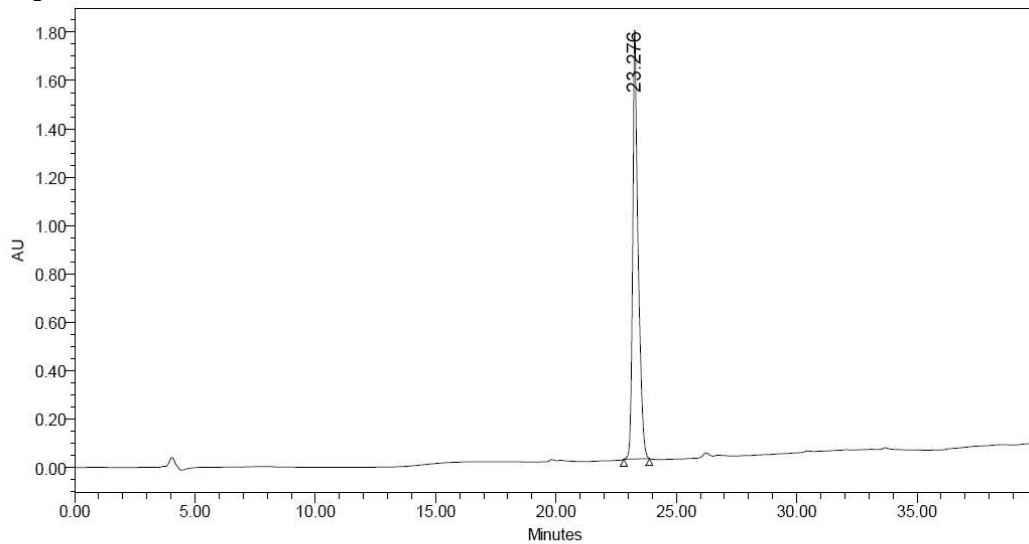

|   | RT     | Area     | % Area | Height  |
|---|--------|----------|--------|---------|
| 1 | 23.276 | 27639992 | 100.00 | 1781543 |
